# Supplementary material
Source: PubMed Central journal article supplement (PMC3796022)
Supplement: NIHMS481922-supplement-1_si_001.pdf [file NIHMS481922-supplement-1_si_001.pdf]

**Supporting information for**

**$\alpha$ A66-80 peptide interacts with soluble  $\alpha$ -crystallin  
and induces its aggregation and precipitation: A  
contribution to age related cataract formation**

*Rama Kannan,<sup>†</sup> Puttur Santhoshkumar,<sup>§</sup> Brian P. Mooney,<sup>||</sup> and K. Krishna Sharma<sup>\*,†,§</sup>,*

<sup>†</sup>Department of Biochemistry, University of Missouri, Columbia, Missouri, United States of  
America,

<sup>§</sup>Department of Ophthalmology, University of Missouri–Columbia School of Medicine,  
Columbia, Missouri, United States of America.

<sup>||</sup>Charles W Gehrke Proteomics Center, University of Missouri, Columbia, Missouri.

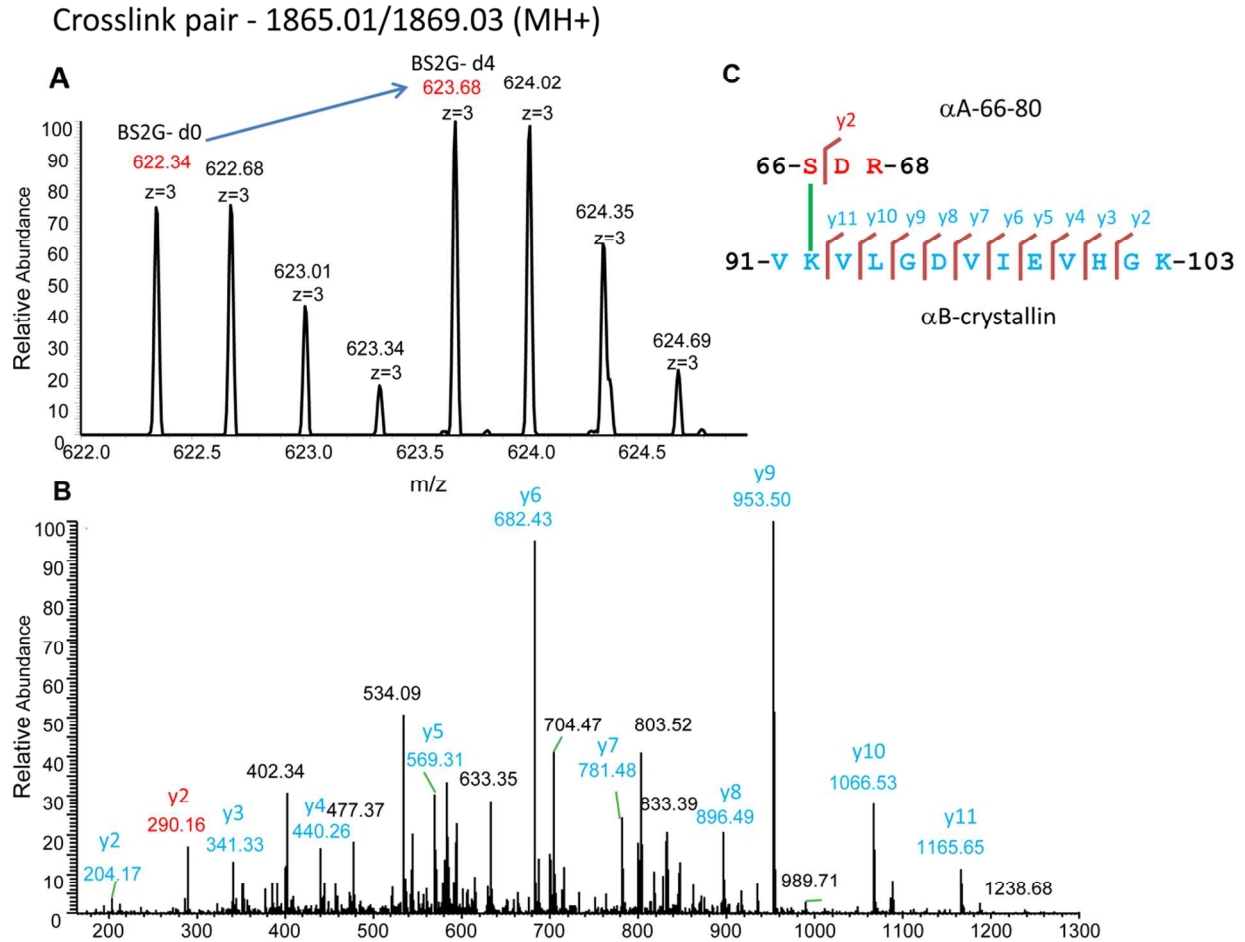

**Figure S1.** Nano-LC-LTQ Orbitrap identification of the  $\alpha$ A66-80 peptide interaction with residues 91-103 of  $\alpha$ B-crystallin. (A) Extracted ion chromatogram of tryptic digest of cross-linked complex. Signal of triply charged peptides with m/z 622.34 and 623.68, cross-linked with light (d<sub>0</sub>) and heavy (d<sub>4</sub>) precursor ions, presenting a mass difference of 1.34 Da, is indicated by arrow. (B) Fragmentation mass spectrum of the identified precursor ion (m/z 622.34) obtained using MS/MS. The identified y are indicated. (C) The interacting region of 66th residue of  $\alpha$ A66-80 with Lys 92 of  $\alpha$ B-crystallin is shown in the identified cross-linked sequences.

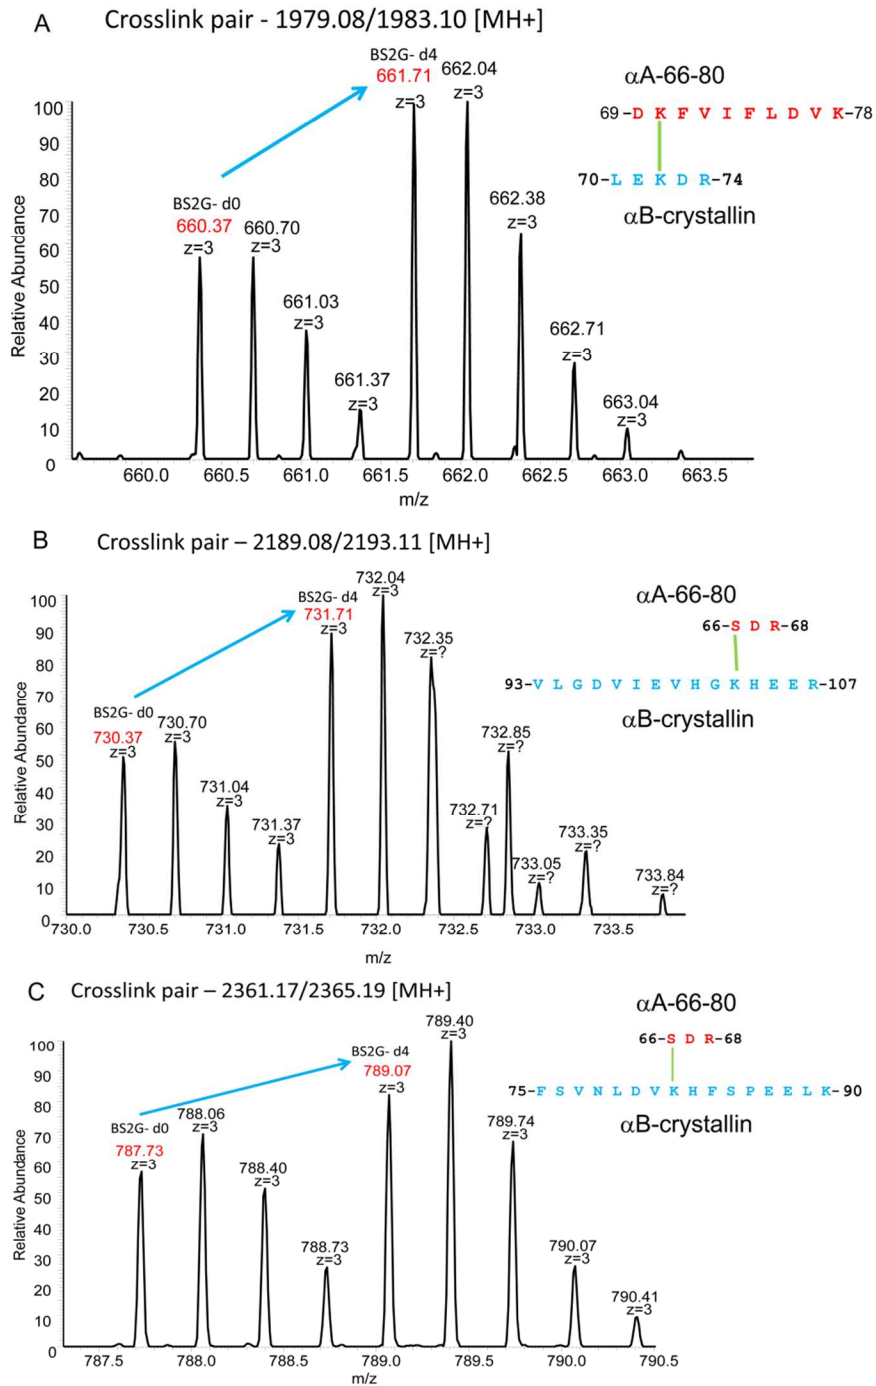

**Figure S2.** Cross-linked pairs identified in LC-MS spectra using GPMW. Extracted ion chromatogram of cross-linked species showing triply charged peptides with A) m/z 660.37/661.71 pair B) m/z 730.37/731.71 pair C) m/z 787.73/789.07 pair. Each panel shows the corresponding interacting sequences in  $\alpha$ B-crystallin and  $\alpha$ A66-80 peptide.

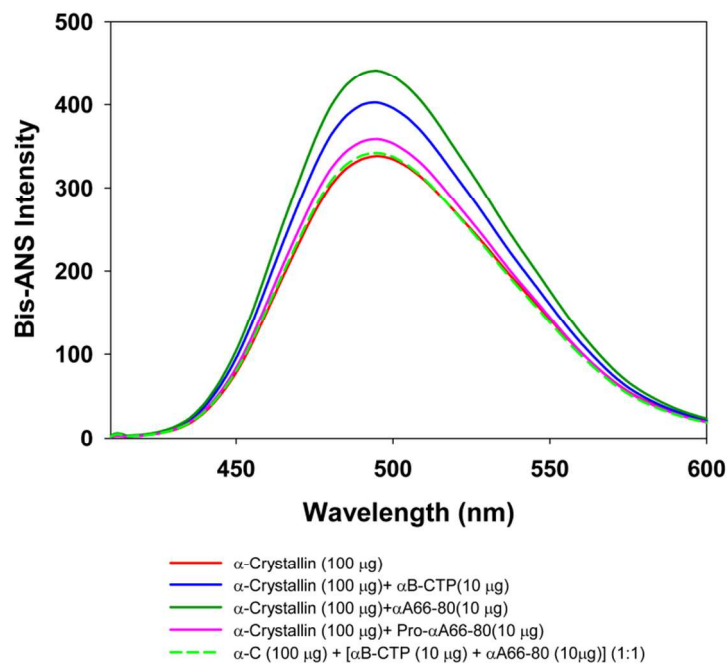

**Figure S3** Bis-ANS intensity of  $\alpha$ -crystallin in the presence of  $\alpha$ A66-80 and  $\alpha$ B-CTP ( C-terminal peptide).  $\alpha$ -Crystallin (100 $\mu$ g) was mixed with 10  $\mu$ g each of  $\alpha$ A66-80 and  $\alpha$ B-CTP. Bis-ANS( 20  $\mu$ M) was added and the samples were incubated for 10 min before fluorescence measurements.
